# Supplementary material for: Evolution of Rabies in South America and Inter-Species Dynamics (2009–2018)
Source: MDPI journal article supplement (doi:10.3390/tropicalmed6020098), 2021-06-09
Supplement: s1 [file s1]

## Model Selection Details

| <b>Human Cases of Rabies per each Administrative Unit</b>                                                    |            |
|--------------------------------------------------------------------------------------------------------------|------------|
| <b>Model Formula</b>                                                                                         | <b>AIC</b> |
| Null model                                                                                                   | 716.2      |
| tot_hum ~ occur_livest+occur_pet+<br>occur_bat +occur_wild+(1 country)                                       | 612.5      |
| tot_hum ~ occur_pet+ occur_bat<br>+occur_wild+(1 country)                                                    | 680.3      |
| tot_hum ~ occur_livest+ occur_bat<br>+occur_wild+(1 country)                                                 | 636.8      |
| tot_hum ~ occur_livest+occur_pet+<br>occur_wild+(1 country)                                                  | 612.0      |
| tot_hum ~ occur_livest + occur_pet +<br>occur_bat + (1   country)                                            | 610.5      |
| <b>Human Cases of Rabies per each Administrative unit due to Terrestrial Variants</b>                        |            |
| Null Model                                                                                                   | 234.5      |
| terr_cycle ~ occur_livest+occur_pet+<br>occur_bat +occur_wild+(1 country)                                    | 108.6      |
| terr_cycle ~ occur_pet+ occur_bat<br>+occur_wild+(1 country)                                                 | 109.9      |
| terr_cycle ~ occur_livest+ occur_bat<br>+occur_wild+(1 country)                                              | 185.5      |
| terr_cycle ~ occur_livest+occur_pet+<br>occur_wild+(1 country)                                               | 111.3      |
| terr_cycle ~<br>occur_livest+occur_pet+occur_bat<br>+(1 country)                                             | 106.7      |
| <b>Human Cases of Rabies per each Administrative Unit due to Eerial Variants<br/>During the Study Period</b> |            |
| Null Model                                                                                                   | 595.8      |
| aer_cycle ~ occur_livest+occur_pet+<br>occur_bat +occur_wild+(1 country)                                     | 527.1      |
| aer_cycle ~ occur_pet+ occur_bat<br>+occur_wild+(1 country)                                                  | 590.2      |
| aer_cycle ~ occur_livest+ occur_bat<br>+occur_wild+(1 country)                                               | 529.4      |
| aer_cycle~ occur_livest+occur_pet+<br>occur_wild+(1 country)                                                 | 525.2      |
| aer_cycle ~<br>occur_livest+occur_pet+occur_bat+<br>(1 country)                                              | 529.5      |

### **Variance-Covariance Matrix for all Parameters (Fixed and Random Effect)**

#### **Model: Human Cases of Rabies per each Administrative Unit**

(Intercept) occur\_livest occur\_pet occur\_bat cov\_country.(Intercept)

|      |               |               |               |               |              |
|------|---------------|---------------|---------------|---------------|--------------|
| [1,] | 2.2597148495  | -0.0096970447 | -0.0008812338 | 0.0039729917  | -4.291857199 |
| [2,] | -0.0096970447 | 0.0005541615  | 0.0000262479  | -0.0002906874 | 0.035036172  |
| [3,] | -0.0008812338 | 0.0000262479  | 0.0007701030  | 0.0001642531  | -0.003919408 |
| [4,] | 0.0039729917  | -0.0002906874 | 0.0001642531  | 0.0027367088  | -0.024627804 |
| [5,] | -4.2918571993 | 0.0350361723  | -0.0039194076 | -0.0246278041 | 26.583598664 |

#### **Model: Human Cases of Rabies per each Administrative Unit due to Terrestrial Variants**

(Intercept) occur\_livest occur\_pet occur\_bat cov\_country.(Intercept)

|      |             |               |               |               |              |
|------|-------------|---------------|---------------|---------------|--------------|
| [1,] | 0.80326783  | -0.0215328034 | -0.0259548547 | -0.0333524150 | -0.698333674 |
| [2,] | -0.02153280 | 0.0015412907  | 0.0001484313  | -0.0007411757 | 0.024695080  |
| [3,] | -0.02595485 | 0.0001484313  | 0.0050936295  | 0.0078709213  | -0.008399637 |
| [4,] | -0.03335242 | -0.0007411757 | 0.0078709213  | 0.1505975722  | -0.032304208 |
| [5,] | -0.69833367 | 0.0246950800  | -0.0083996370 | -0.0323042081 | 1.648082774  |

#### **Model: Human Cases of Rabies per each Administrative Unit due to Aerial Variants during the Study Period**

(Intercept) occur\_livest occur\_pet occur\_wild cov\_country.(Intercept)

|      |               |               |               |              |              |
|------|---------------|---------------|---------------|--------------|--------------|
| [1,] | 5.840415194   | -1.186249e-02 | -5.437471e-03 | 0.003028474  | -20.85444368 |
| [2,] | -0.011862490  | 5.371572e-04  | 2.100018e-05  | 0.000029163  | 0.04850682   |
| [3,] | -0.005437471  | 2.100018e-05  | 5.467061e-03  | -0.003487211 | 0.01052727   |
| [4,] | 0.003028474   | 2.916300e-05  | -3.487211e-03 | 0.004969458  | -0.01029719  |
| [5,] | -20.854443677 | 4.850682e-02  | 1.052727e-02  | -0.010297188 | 120.79225166 |
